# Supplementary material for: Metal–organic framework micro-nano reactors as armour of Escherichia coli for hydrogen production in air
Source: Royal Society of Chemistry journal article supplement (doi:10.1039/d4qi02119c), 2024-01-01
Supplement: d4qi02119c1.pdf [file d4qi02119c1.pdf]

## Electronic Supplementary Information

### Metal–organic framework micro-nano reactors as armour of *Escherichia coli* for the hydrogen production in air

Yun Fan, Junyang Yan, Siyao Zhang, Ruifa Su, Baoli Zha and Weina Zhang\*

Key Laboratory of Flexible Electronics (KLOFE), Institute of Advanced Materials (IAM)  
& School of Flexible Electronics (Future Technologies), Nanjing Tech University, 30  
South Puzhu Road, Nanjing 211816, China

\*Corresponding author.

E-mail address: iamwnzhang@njtech.edu.cn (W. Zhang).

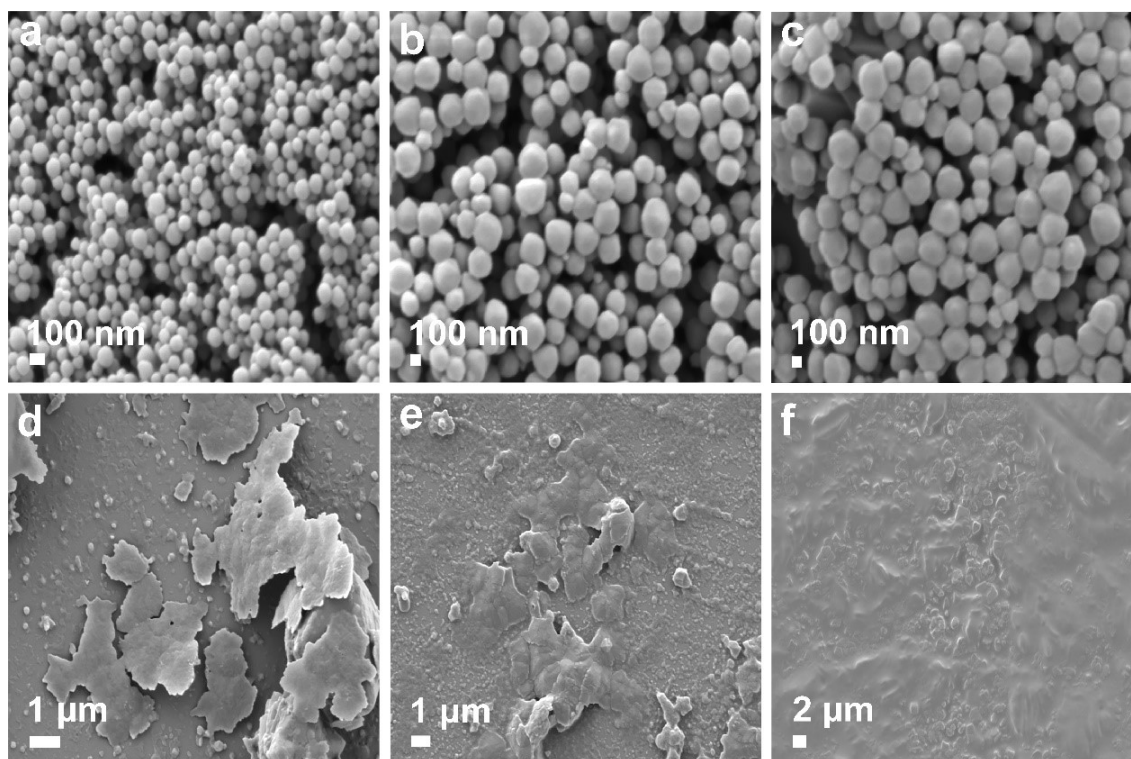

**Figure S1** SEM images of ZIF-8 synthesized by reacting with Zn ions and 2-MeIm at a mass ratio of 1:30 for (a) 10 min, (b) 20 min, and (c) 30 min. SEM images of ZIF-8 synthesized by reacting with Zn ions and 2-MeIm at a mass ratio of 1:2 for (d) 40 min, (e) 60 min, and (f) 90 min.

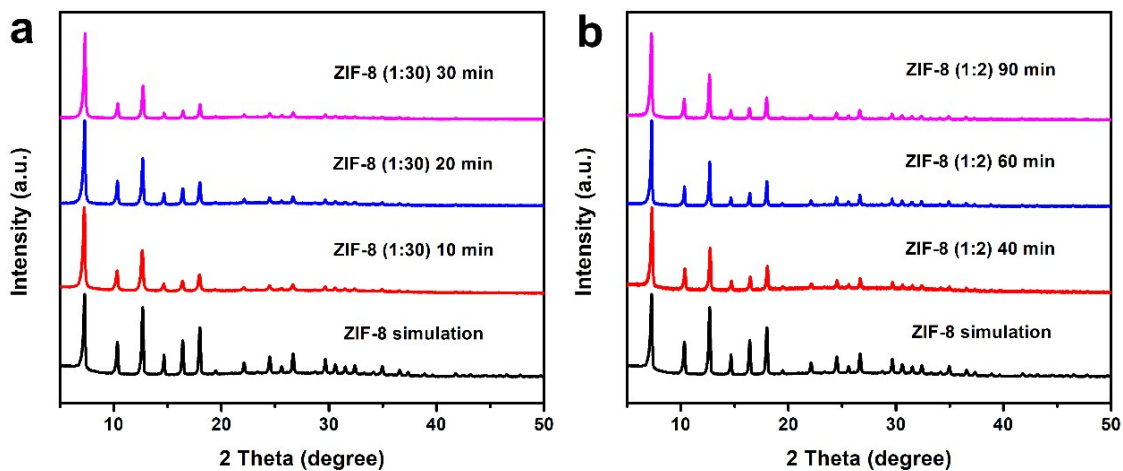

**Figure S2** (a) XRD patterns of ZIF-8 synthesized by reacting with Zn ions and 2-MeIm at a mass ratio of 1:30 for 10 min, 20 min, and 30 min, respectively. (b) XRD patterns of ZIF-8 synthesized by reacting with Zn ions and 2-MeIm at a mass ratio of 1:2 for 40 min, 60 min, and 90 min, respectively.

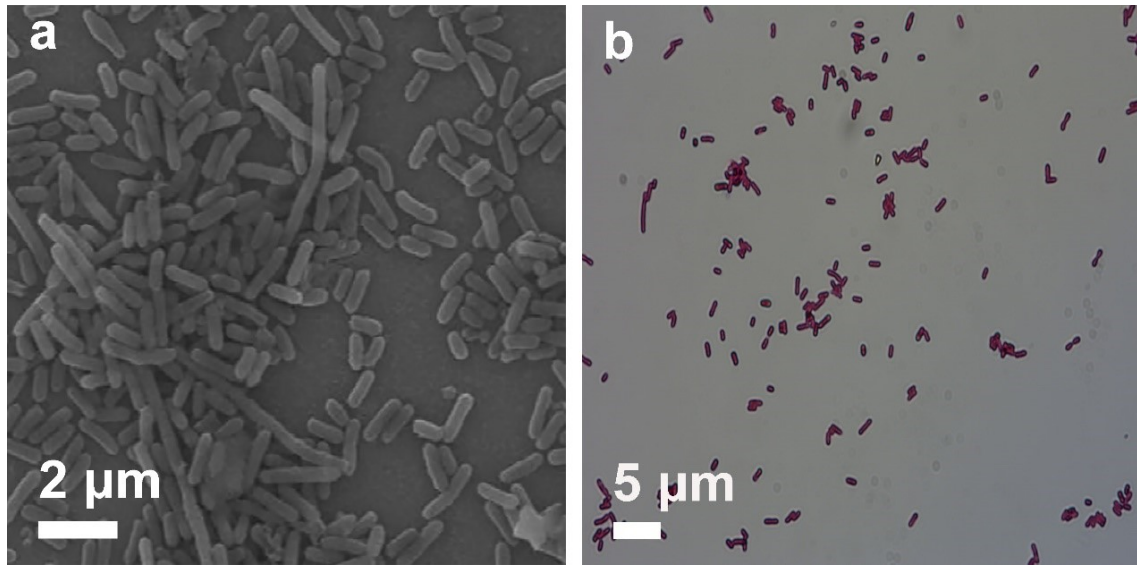

**Figure S3** (a) SEM image of *E. coli*. (b) Optical microscope image of *E. coli*.

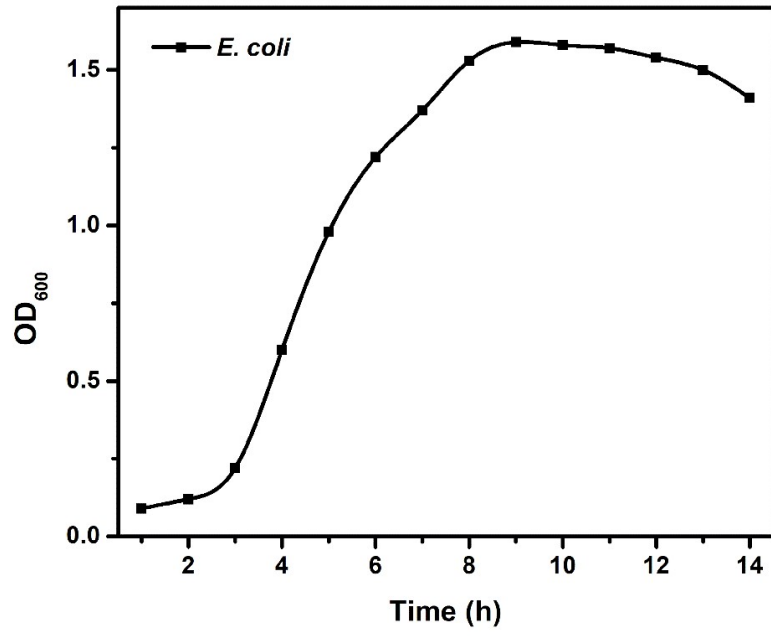

**Figure S4** Growth curve of *E. coli*.

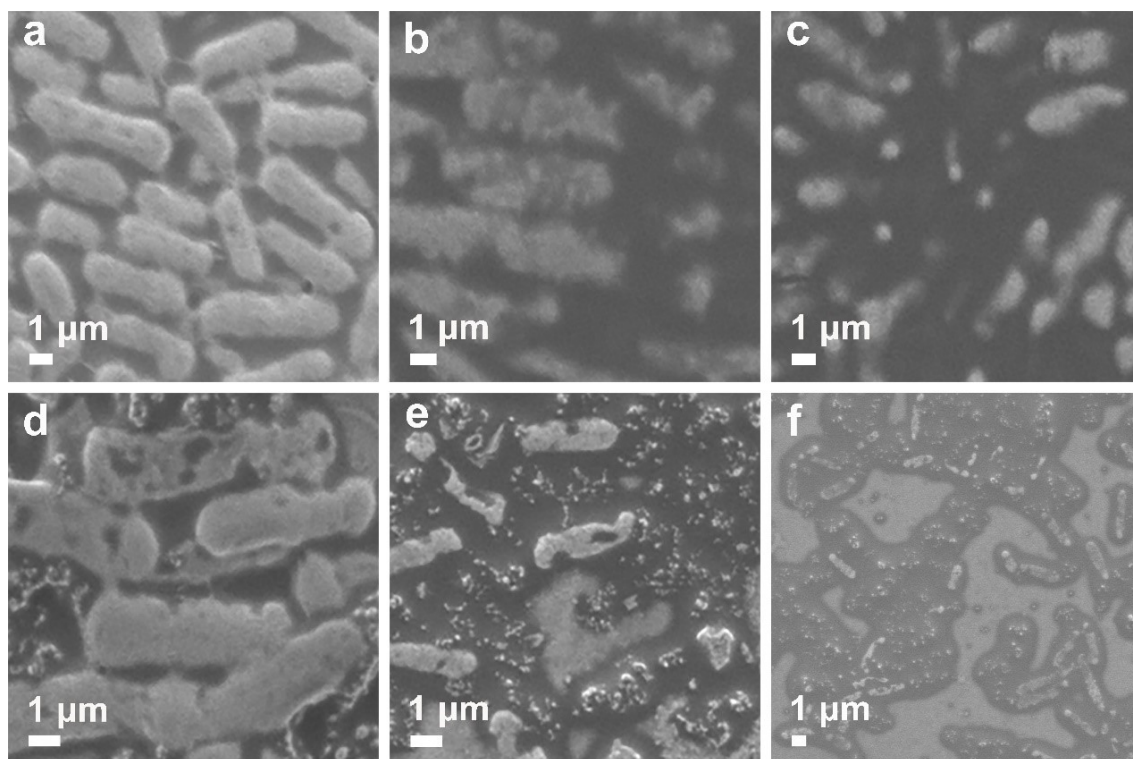

**Figure S5** SEM images of *E. coli* under different conditions. (a) 0.5 M, (b) 1 M, (c) 2 M zinc ion solution was added to *E. coli* respectively. (d) 3.5 M, (e) 7 M, (f) 10 M 2-MeIm solution was added to *E. coli* respectively.

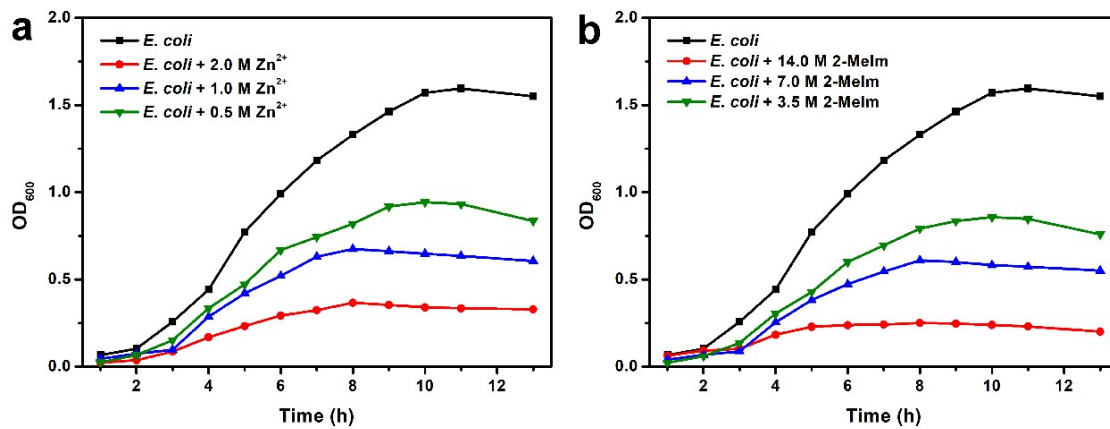

**Figure S6** Growth curves of *E. coli* under different conditions. (a) *E. coli* in different concentrations of zinc ion solutions. (b) *E. coli* in different concentrations of 2-MeIm solutions.

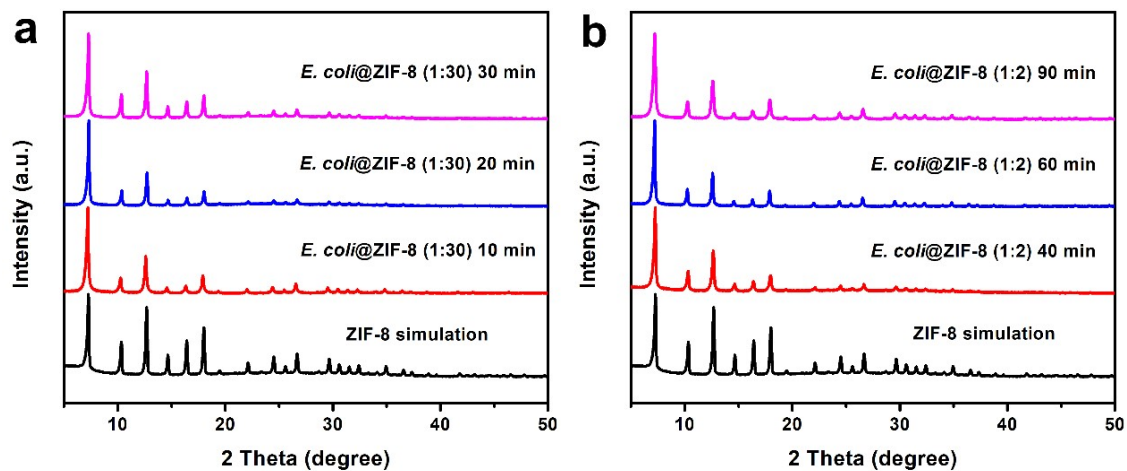

**Figure S7** (a) XRD patterns of *E. coli*@ZIF-8 (1:30) for reacting 10 min, 20 min, and 30 min, respectively. (b) XRD patterns of *E. coli*@ZIF-8 (1:2) for reacting 40 min, 60 min, and 90 min, respectively.



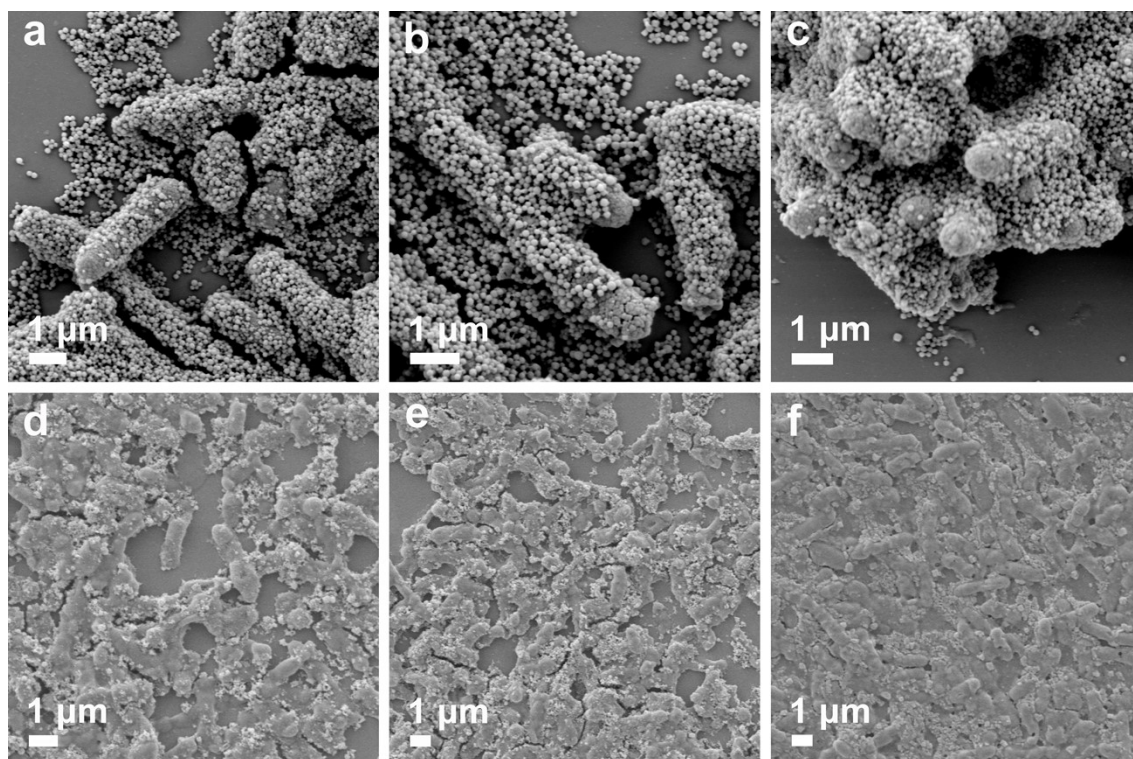

**Figure S8** (a-c) SEM images of *E. coli*@ZIF-8 MNR with precursors mass ratio of 1:30 and reaction times of 10, 20, and 30 min after hydrogen production. (d-f) SEM images of *E. coli*@ZIF-8 MNR with precursors mass ratio of 1:2 and reaction times of 40, 60, and 90 min after hydrogen production.

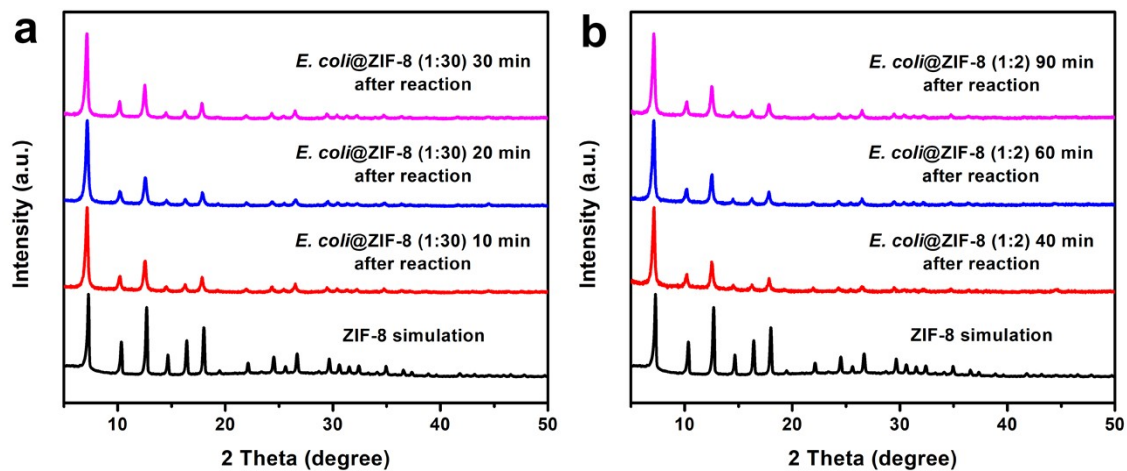

**Figure S9** (a) XRD patterns of *E. coli*@ZIF-8 MNR with precursors mass ratio of 1:30 and reaction times of 10, 20, and 30 min after hydrogen production. (b) XRD patterns of *E. coli*@ZIF-8 MNR with precursors mass ratio of 1:2 and reaction times of 40, 60, and 90 min after hydrogen production.
